# Supplementary material for: Evolutionary and Genetic Recombination Analyses of Coxsackievirus A6 Variants Associated with Hand, Foot, and Mouth Disease Outbreaks in Thailand between 2019 and 2022
Source: MDPI journal article supplement (doi:10.3390/v15010073), 2022-12-27
Supplement: s1 [file s1]

**Table S1:** Primer set used for VP1 and 3Dpol sequencing

| Target region | Primer name    | Sequence (5' to 3')                | Position* |
|---------------|----------------|------------------------------------|-----------|
| VP1           | CVA6-F2632/VP1 | TGT GTG ATG AAT CGA AAC GGG GT     | 2630-2652 |
|               | CVA6-R3288/VP1 | TGC AGT GTT AGT TAT TGT TTG GCT    | 3263-3286 |
| 3Dpol         | CAV6-F6107-OS  | CGC CTC GAG GTR GAT TTY GAR CA     | 6107-6129 |
|               | CAV6-R7428-OAS | CTG GTT ATA ACA AAT TTA CCC CCA CC | 7403-7428 |
|               | CAV6-F6188/IS  | GAR GCA GCH CTV CAY TAT GCA AAY CA | 6188-6213 |
|               | CAV6-R7388/IAS | CCA GAT TYC TGG TGG GGT TGA G      | 7367-7388 |

\*Relative to the sequence of the Gdula strain (GenBank accession number AY421764).

**Table S2:** Primer set used for whole genome amplification by nested RT-PCR

| No. | Primer         | Sequence (5' to 3')                | Position    |
|-----|----------------|------------------------------------|-------------|
| 1   | CVA6-F39/OS    | ACT GGG CGC YAG CAC ACT GAT TC     | 39 - 61     |
|     | CVA6-R1673/OAS | AGT TAR TGT RAT TGG YAC YTC TGT    | 1650 - 1673 |
|     | CVA6-F55/IS    | CTG ATT CTA YGG AAY CTT TGT GCG    | 55 - 78     |
|     | CVA6-R1567/IAS | GGA AGY GCR TTR ACA TAT GGC AT     | 1545 - 1567 |
| 2   | CVA6-F1266/OS  | TCG GGY TTC TGY ATG CAY GTT CA     | 1266 - 1288 |
|     | CVA6-R2806/OAS | GAY AGT TCT AGY TTG CGC CGC TG     | 2784 - 2806 |
|     | CVA6-F1290/IS  | TGY AAY GCR AGC AAR TTC CAT CA     | 1290 - 1312 |
|     | CVA6-R2727/IAS | CCG AGT CCT TYA CCT CCA CAA C      | 2706 - 2727 |
| 3   | CVA6-F2458/OS  | CRA ATG CDG TGG AAA GYG CTG T      | 2458 - 2479 |
|     | CVA6-R3832/OAS | CCT TTG ATR TAA TCW GAY ACD CC     | 3810 - 3832 |
|     | CVA6-F2485/IS  | GCR CTY GCT GAY ACC ACA ATA TC     | 2485 - 2506 |
|     | CVA6-R3816/IAS | GAC ACC CTG YTC CAT RGC TTC        | 3795 - 3816 |
| 4   | CVA6-F3498/OS  | GCT CAR GGA TGT GAY ACY ATT GC     | 3498 - 3520 |
|     | CVA6-R4564/OAS | CTA GAG TGR TAY TTR TCR GCT AT     | 4542 - 4564 |
|     | CVA6-F3603/IS  | GTC TTY GTG GAA GCT AGT GAG TA     | 3603 - 3625 |
|     | CVA6-R4463/IAS | ACG GTG TTT GCT CTT GAA CTG CAT    | 4440 - 4463 |
| 5   | CVA6-F4107/OS  | AGY GCA TCN TGG CTH AAG AAG TT     | 4107 - 4129 |
|     | CVA6-R5482/OAS | TGA TCY GTY TGV ACY TGC CTR AT     | 5460 - 5482 |
|     | CVA6-F4214/IS  | TRT ACC AGC AGC TAA AGA GAA GGT    | 4214 - 4237 |
|     | CVA6-R5330/IAS | GTA GAT RAC ATA CAC CAR TGA RAC    | 5307 - 5330 |
| 6   | CVA6-F4994/OS  | ATC CAA RGT BAG RTA YAG TGT GGA    | 4994 - 5017 |
|     | CVA6-R6422/OAS | GAG RTC AAR DCC ATA CTT RTC CAT    | 6399 - 6422 |
|     | CVA6-F5061/IS  | GCY ATT GGN AAC ACA ATC GAA GC     | 5061 - 5083 |
|     | CVA6-R6364/IAS | GGG TCY AAR ATG TCY CTC TTC TT     | 6342 - 6364 |
| 7   | CVA6-F6107-OS  | CGC CTC GAG GTR GAT TTY GAR CA     | 6107-6129   |
|     | CVA6-R7428-OAS | CTG GTT ATA ACA AAT TTA CCC CCA CC | 7403-7428   |
|     | CVA6-F6188/IS  | GAR GCA GCH CTV CAY TAT GCA AAY CA | 6188-6213   |
|     | CVA6-R7388/IAS | CCA GAT TYC TGG TGG GGT TGA G      | 7367-7388   |
